# Supplementary material
Source: HighWire-hosted journal article supplement (https://jnm.snmjournals.org/highwire/filestream/108835/field_highwire_adjunct_files/0/263323_Supplemental_Data.pdf)
Supplement: 263323_Supplemental_Data.pdf [file 263323_Supplemental_Data.pdf]

## General Information

The Fmoc-(9-fluorenylmethoxycarbonyl-) and all other protected amino acid analogues were purchased from *Bachem Inc.* (Bubendorf, Switzerland), *Merck KGaA* (Darmstadt, Germany) or *Iris Biotech GmbH* (Marktredwitz, Germany). The *H*-Rink amide ChemMatrix<sup>®</sup> resin (35-100 mesh particle size, 0.4-0.6 mmol/g loading) was purchased from *Merck KGaA* (Darmstadt, Germany). *CheMatech* (Dijon, France) delivered the chelators DOTA(<sup>t</sup>Bu)<sub>3</sub> as well as DOTAGA(<sup>t</sup>Bu)<sub>4</sub>. Peptide syringes were obtained from *VWR International GmbH* (Bruchsal, Germany).

All necessary solvents and other organic reagents were purchased from either, *Alfa Aesar™* (Karlsruhe, Germany), *Merck KGaA* (Darmstadt, Germany) or *VWR International GmbH* (Bruchsal, Germany). Solid-phase synthesis of the peptides was carried out by manual operation using a Scilogex MX-RL-E Analog Rotisserie Tube Rotator (*Scilogex®*, Rocky Hill, CT, USA). H<sub>2</sub>O was used after purification by a Barnstead MicroPure system (*Thermo Fisher Scientific Inc.*, Waltham, MA, USA).

Analytical and preparative reversed-phase high performance liquid chromatography (RP-HPLC) were performed using Shimadzu gradient systems (*Shimadzu Deutschland GmbH*, Neufahrn, Germany), each equipped with a SPD-20A UV/Vis detector (220 nm, 254 nm). Different gradients of MeCN (0.1% TFA) in H<sub>2</sub>O (0.1% TFA) were used as eluents for all RP-HPLC operations.

For analytical measurements, a Nucleosil 100 C18 (125 × 4.6 mm, 5 μm particle size) column (*CS Chromatographie Service GmbH*, Langerwehe, Germany) was used at a flow rate of 1 mL/min. Both, specific gradients and the corresponding retention times  $t_R$  as well as the capacity factor  $K'$  are cited in the text.

Preparative RP-HPLC purification was done with a Multospher 100 RP 18 (250 × 10 mm, 5 μm particle size) column (*CS Chromatographie GmbH*, Langerwehe, Germany) at a constant flow rate of 5 mL/min.

Analytical and preparative radio RP-HPLC was performed using a MultoKrom 100-5 C18 (5 µm, 125 × 4.6 mm) column (*CS Chromatographie GmbH*, Langerwehe, Germany).

Electrospray ionization-mass spectra for characterization of the substances were acquired on an expression<sup>1</sup> CMS mass spectrometer (*Advion Ltd.*, Harlow, UK).

For radiolabeling, <sup>177</sup>LuCl<sub>3</sub> (Molar Activity ( $A_M$ ) >3000 GBq/mg, 740 MBq/mL, 0.04 M HCl, *ITG GmbH*, Garching, Germany) was used. Radioactivity was detected through connection of the outlet of the UV-photometer to an AceMate 925-Scint NaI(Tl) well-type scintillation counter from *EG&G Ortec*<sup>®</sup> (Oak Ridge, TN, USA). Radioactive samples were measured by a WIZARD<sup>2®</sup> 2480 Automatic γ-Counter (*Perkin Elmer Inc.*, Waltham, MA, USA) and determination of  $IC_{50}$  values was carried out using GraphPad Prism 6 (*GraphPad Software Inc.*, San Diego, CA, USA). For radio TLC, a Scan-RAM<sup>™</sup> Scanner with Laura<sup>™</sup> software (*LabLogic Systems Ltd.*, Broomhill, Sheffield, United Kingdom) was used.

Lyophilization was accomplished using an Alpha 1-2 LDplus lyophilizer (*Martin Christ Gefriertrocknungsanlagen GmbH*, Osterode am Harz, Deutschland) combined with a RZ-2 vacuum pump (*Vacuubrand GmbH & Co KG*, Olching, Germany).

For *in vitro* and *in vivo* studies, the used nutrition mixture Dulbecco's modified eagle's medium/Ham's F-12 (DMEM/F-12,  $v/v = 1/1$ , with stable glutamine), fetal bovine serum (FBS Superior), phosphate buffered saline (PBS Dulbecco, without Ca<sup>2+</sup>/Mg<sup>2+</sup>), trypsin/EDTA (0.05%/0.02% in PBS without Ca<sup>2+</sup>/Mg<sup>2+</sup>) solution as well as Hank's balanced salt solution (HBSS, with 0.35 g/L NaHCO<sub>3</sub> and Ca<sup>2+</sup>/Mg<sup>2+</sup>) were obtained from *Biochrom GmbH* (Berlin, Germany). Solution of purified products was applied using Tracepur<sup>®</sup> H<sub>2</sub>O (*Merck KGaA*, Darmstadt, Germany). Bovine serum albumin (BSA) was purchased from *Merck KGaA* (Darmstadt, Germany).

Cells were cultured in CELLSTAR<sup>®</sup> cell culture flasks and seeded in 24-well plates (*Greiner Bio-One GmbH*, Kremsmünster, Austria) after being counted with a Neubauer hemocytometer (*Paul Marienfeld*, Lauda-Königshofen, Germany) using Trypan Blue (0.4% in 0.81% NaCl and 0.06% potassium phosphate) solution (*Sigma-Aldrich GmbH*, Munich, Germany). Cells were handled inside a MSC Advantage laminar flow cabinet and maintained

in a Heracell 150i incubator (*Thermo Fisher Scientific Inc.*, Waltham, MA, USA) at 37 °C in a humidified 5% CO<sub>2</sub> atmosphere.

### **General Procedures (GP) and Execution Protocols**

*On-resin Peptide Formation (GP1).* The respective side-chain protected Fmoc-AA-OH (1.5 eq.) is dissolved in NMP and pre-activated by adding TBTU (1.5 eq.), HOAt (1.5 eq.) and DIPEA (4.5 eq.). After activation for 10 min, the solution is added to resin-bound free amine peptide and shaken for 1.5 h at rt. Subsequently, the resin is washed with NMP (6 × 20 mL/g resin) and after Fmoc deprotection (GP2), the next amino acid is coupled analogously.

*On-resin Fmoc Deprotection (GP2).* The resin-bound Fmoc-peptide is treated with 20% piperidine in NMP (*v/v*) for 5 min and subsequently for 15 min. Afterwards, the resin is washed with NMP (6 × 20 mL/g resin).

*Conjugation of Chelator (GP3).* The protected chelator DOTA(<sup>t</sup>Bu)<sub>3</sub> or DOTAGA(<sup>t</sup>Bu)<sub>4</sub> (1.5 eq.) is dissolved in NMP and pre-activated by adding TBTU (1.5 eq.), HOAt (1.5 eq.) and DIPEA (4.5 eq.). After activation for 10 min, the solution is added to resin-bound *N*-terminal deprotected peptide (1.0 eq.) and shaken for 3 h at rt. Subsequently, the resin is washed with NMP (3 × 20 mL/g resin) and DCM (3 × 20 mL/g resin).

*Peptide Cleavage from the Resin with additional Deprotection of acid labile Protecting Groups (GP4).* The fully protected resin-bound peptide is washed with DCM, afterwards dissolved in a mixture of TFA/TIPS/DCM (*v/v/v*; 95/2.5/2.5) and shaken for 45 min. The solution is filtered off and the resin is treated in the same way for another 45 min. Both filtrates are combined and concentrated under a stream of nitrogen. After dissolving the residue in MeOH and precipitation in diethyl ether, the liquid is decanted and the remaining solid is dried. As the deprotection of the <sup>t</sup>Bu groups is usually not complete using this procedure (see Supplemental Fig. 11 for AMTG as an example), a further deprotection method is used (GP5).

*Complete Deprotection of <sup>t</sup>Bu (GP5).* Removal of remaining <sup>t</sup>Bu protecting groups after peptide cleavage from the resin (GP4) is carried out by dissolving the crude DOTA or DOTAGA

coupled product in TFA and stirring for 6 h and 16 h at rt, respectively. After removing TFA under a stream of nitrogen, the crude unprotected product is obtained.

### Cold Complexation

The purified chelator-containing ligand ( $10^{-3}$  M in Tracepur<sup>®</sup> H<sub>2</sub>O, Merck KGaA, Darmstadt, Germany, 1.0 eq.) and <sup>nat</sup>LuCl<sub>3</sub> (20 mM in Tracepur<sup>®</sup> H<sub>2</sub>O, 2.5 eq.) were diluted with Tracepur<sup>®</sup> H<sub>2</sub>O to a final concentration of  $10^{-4}$  M and heated to 95 °C for 30 min. After cooling to room temperature, the crude product was obtained and used without further purification for IC<sub>50</sub> studies. In order to confirm that the remaining excess of 1.5 eq. <sup>nat</sup>LuCl<sub>3</sub> did not affect the cell-based assay, a validation experiment was carried out (see *In Vitro Experiments* below).

### Radiolabeling

<sup>125</sup>I-Labeling. Briefly, 0.2 mg of D-Tyr<sup>6</sup>-MJ9 were dissolved in 20 μL Tracepur<sup>®</sup> H<sub>2</sub>O and 280 μL TRIS buffer (25 mM TRIS · HCl, 0.4 M NaCl, pH = 7.9). After solution was transferred to a vial containing 150 μg surface-bound Iodo-Gen<sup>®</sup> (1,3,4,6-Tetrachloro-3α,6α-diphenylglycouril, Merck KGaA, Darmstadt, Germany), 5.0 μL (16 MBq) <sup>125</sup>I-Nal (74 TBq/mmol, 3.1 GBq/mL, 40 mM NaOH, Hartmann Analytic, Braunschweig, Germany) were added. The reaction solution was incubated for 15 min at room temperature and purified by RP-HPLC. Immediately after purification, sodium ascorbate (0.1 M in Tracepur<sup>®</sup> H<sub>2</sub>O, 10 vol-%) was added to prevent radiolysis.

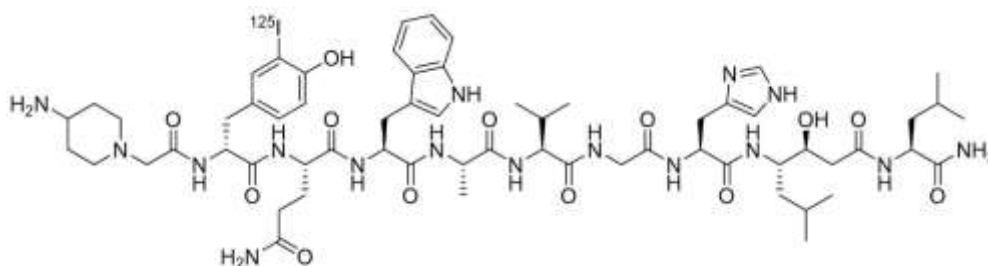

**SUPPLEMENTAL FIGURE 1.** Structural formula of the radiolabeled reference 3-<sup>125</sup>I-D-Tyr<sup>6</sup>-MJ9.

3-<sup>125</sup>I-D-Tyr<sup>6</sup>-MJ9. RP-HPLC (20→35% MeCN in 20 min).  $t_R = 18.5$  min,  $K' = 12.21$ .

3-I-D-Tyr<sup>6</sup>-MJ9. RP-HPLC (20→35% MeCN in 20 min).  $t_R = 18.4$  min,  $K' = 12.14$ .

Calculated monoisotopic mass ( $C_{78}H_{118}N_{20}O_{19}$ ): 1394.6, found:  $m/z = 698.3 [M+2H]^{2+}$ , 1394.9  $[M+H]^+$ .

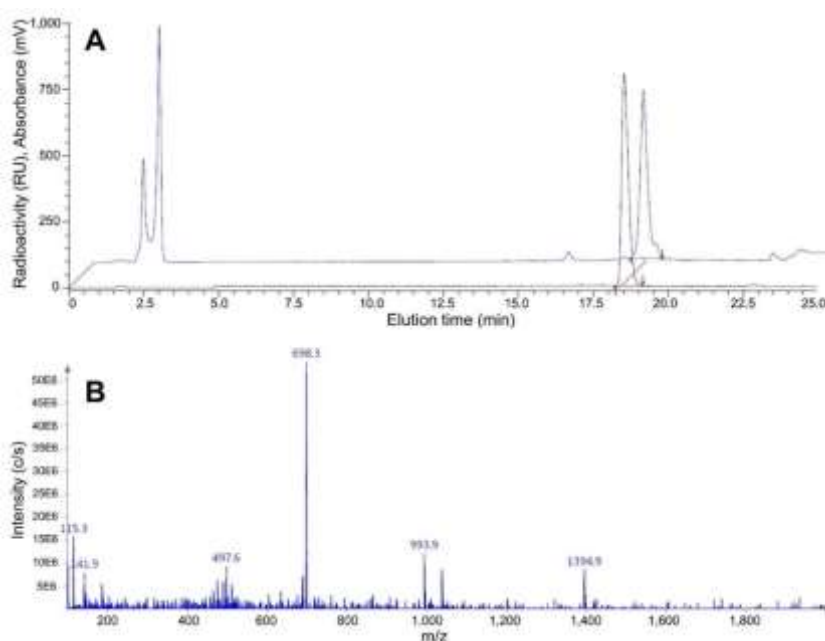

**SUPPLEMENTAL FIGURE 2.** (A) Confirmation of peptide integrity for  $3\text{-}^{125}\text{I}\text{-D-Tyr}^6\text{-MJ9}$  (black), as analyzed by analytical (radio-)RP-HPLC (MultoKrom 100-5 C18, 5  $\mu\text{m}$ , 125  $\times$  4.6 mm, *CS Chromatographie GmbH*, Langerwehe, Germany; 20 $\rightarrow$ 35% MeCN in  $\text{H}_2\text{O} + 0.1\%$  TFA in 20 min) *via* co-injection of the cold ligand (blue). (B) Mass spectrum of  $3\text{-I-D-Tyr}^6\text{-MJ9}$ .

**$^{177}\text{Lu}$ -Labeling.** A solution of the purified chelator-containing ligand ( $10^{-3}$  M in Tracepur<sup>®</sup>  $\text{H}_2\text{O}$ , 1  $\mu\text{L}$ ), NaOAc buffer (1.0 M, pH = 5.50, 10  $\mu\text{L}$ ) and approximately 10-30 MBq  $^{177}\text{LuCl}_3$  (0.04 M in HCl) were diluted with HCl (0.04 M) to a total volume of 90  $\mu\text{L}$  and heated to 95  $^\circ\text{C}$  for 10 min. Immediately after labeling, sodium ascorbate (0.1 M, 10  $\mu\text{L}$ ) was added to prevent radiolysis. Incorporation of  $^{177}\text{Lu}$  was determined by radio TLC (ITLC-SG chromatography paper, mobile phase: 0.1 M trisodium citrate). Radiochemical purity of the labeled compound was determined by radio RP-HPLC.

### Characterization of RM2 Derivatives and NeoBOMB1

All mentioned compounds based on the core structure of RM2 were synthesized by standard Fmoc-based SPPS (**GP1-5**) using a *H*-Rink amide ChemMatrix<sup>®</sup> resin (35-100 mesh

particle size, 0.4-0.6 mmol/g loading, Merck KGaA, Darmstadt, Germany). After finishing the peptide sequence with slightly modifications within the RM2 sequence, a chelator was coupled at the resin (**GP3**). Thereafter, the peptide was cleaved (**GP4**) and furthermore, remaining acid labile protection groups were deprotected by TFA (**GP5**) and purified by RP-HPLC.

### RM2 (DOTA-Pip-D-Phe-Gln-Trp-Ala-Val-Gly-His-Sta-Leu-NH<sub>2</sub>)

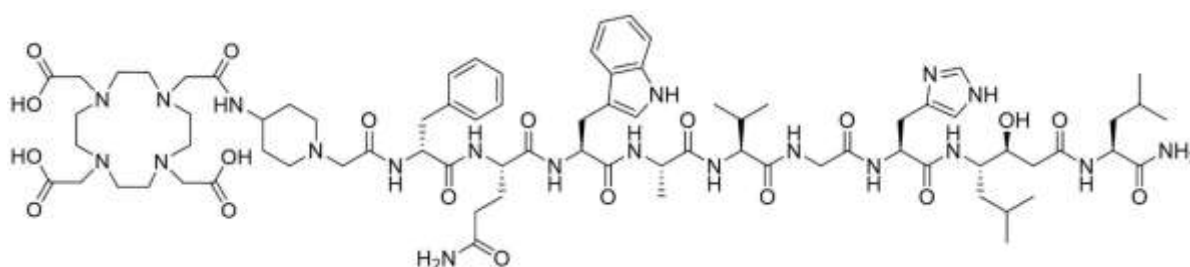

**SUPPLEMENTAL FIGURE 3.** Structural formula of the parent compound RM2.

RM2. RP-HPLC (10→90% MeCN in 15 min):  $t_R = 6.8$  min,  $K' = 3.25$ .

RP-HPLC (20→35% MeCN in 15 min):  $t_R = 13.6$  min,  $K' = 9.46$ .

Calculated monoisotopic mass (C<sub>78</sub>H<sub>118</sub>N<sub>20</sub>O<sub>19</sub>): 1638.9, found:  $m/z = 546.9$  [M+3H]<sup>3+</sup>, 819.7 [M+2H]<sup>2+</sup>.

<sup>nat</sup>Lu-RM2. RP-HPLC (10→90% MeCN in 15 min):  $t_R = 7.3$  min,  $K' = 2.65$ .

RP-HPLC (20→35% MeCN in 15 min):  $t_R = 13.6$  min,  $K' = 9.46$ .

Calculated monoisotopic mass (C<sub>78</sub>H<sub>115</sub>LuN<sub>20</sub>O<sub>19</sub>): 1810.8, found:  $m/z = 605.2$  [M+3H]<sup>3+</sup>, 907.1 [M+2H]<sup>2+</sup>.

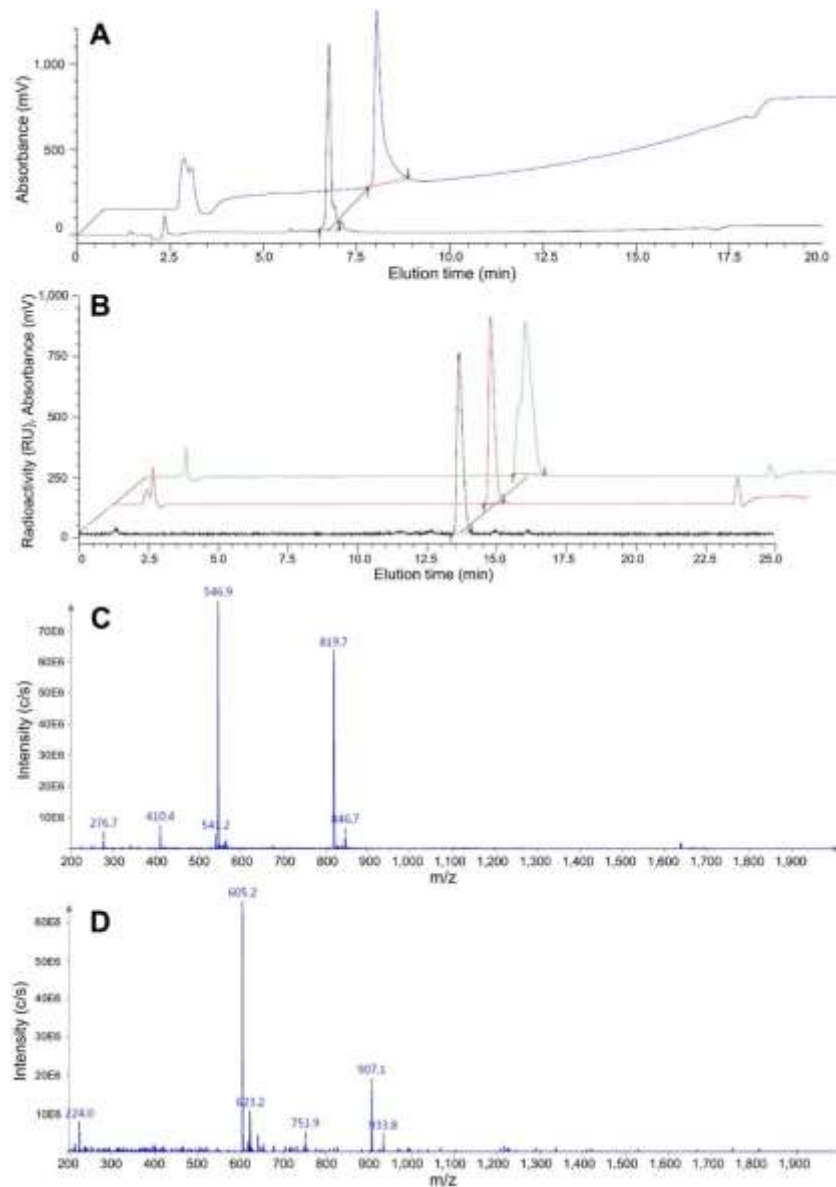

**SUPPLEMENTAL FIGURE 4.** (A) Confirmation of peptide identity and integrity for RM2 (black) and  $^{nat}\text{Lu}$ -RM2 (blue), as analyzed by analytical RP-HPLC (MultoKrom 100-5 C18, 5  $\mu\text{m}$ , 125  $\times$  4.6 mm, *CS Chromatographie GmbH*, Langerwehe, Germany; 10 $\rightarrow$ 90% MeCN in  $\text{H}_2\text{O}$  + 0.1% TFA in 15 min). (B) Confirmation of peptide identity and integrity for  $^{177}\text{Lu}$ -RM2 (black),  $^{nat}\text{Lu}$ -RM2 (red) and RM2 (green), as analyzed by analytical (radio-)RP-HPLC (MultoKrom 100-5 C18, 5  $\mu\text{m}$ , 125  $\times$  4.6 mm, *CS Chromatographie GmbH*, Langerwehe, Germany; 20 $\rightarrow$ 35% MeCN in  $\text{H}_2\text{O}$  + 0.1% TFA in 20 min). Mass spectra of (C) RM2 and (D)  $^{nat}\text{Lu}$ -RM2.

**NeoBOMB1 (DOTA-pABzA-DIG-D-Phe-Gln-Trp-Ala-Val-Gly-His-NH-CH[CH<sub>2</sub>-CH(CH<sub>3</sub>)<sub>2</sub>]<sub>2</sub>)**

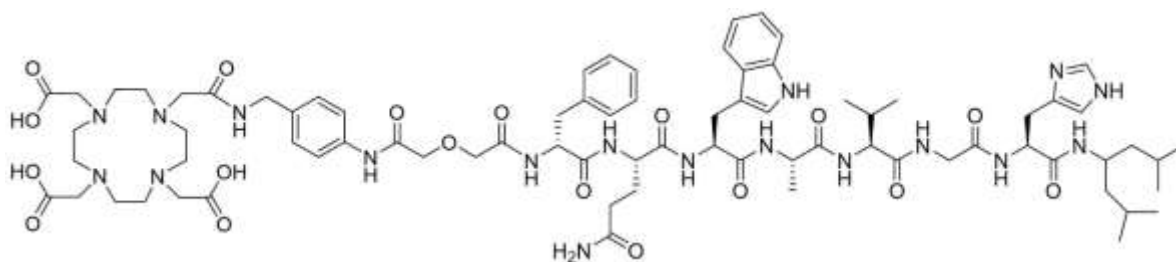

**SUPPLEMENTAL FIGURE 5.** Structural formula of the second reference compound NeoBOMB1.

*NeoBOMB1*. RP-HPLC (10→90% MeCN in 15 min):  $t_R = 9.5$  min,  $K' = 3.75$ .

RP-HPLC (20→35% MeCN in 15 min):  $t_R = 22.4$  min,  $K' = 16.23$ .

Calculated monoisotopic mass ( $C_{77}H_{110}N_{18}O_{18}$ ): 1574.8, found:  $m/z = 787.7 [M+2H]^{2+}$ , 1574.6  $[M+H]^+$ .

*natLu-NeoBOMB1*. RP-HPLC (10→90% MeCN in 15 min):  $t_R = 9.7$  min,  $K' = 3.85$ .

RP-HPLC (20→35% MeCN in 15 min):  $t_R = 22.4$  min,  $K' = 16.23$ .

Calculated monoisotopic mass ( $C_{77}H_{107}LuN_{18}O_{18}$ ): 1746.7, found:  $m/z = 583.5 [M+3H]^{3+}$ , 874.8  $[M+2H]^{2+}$ .



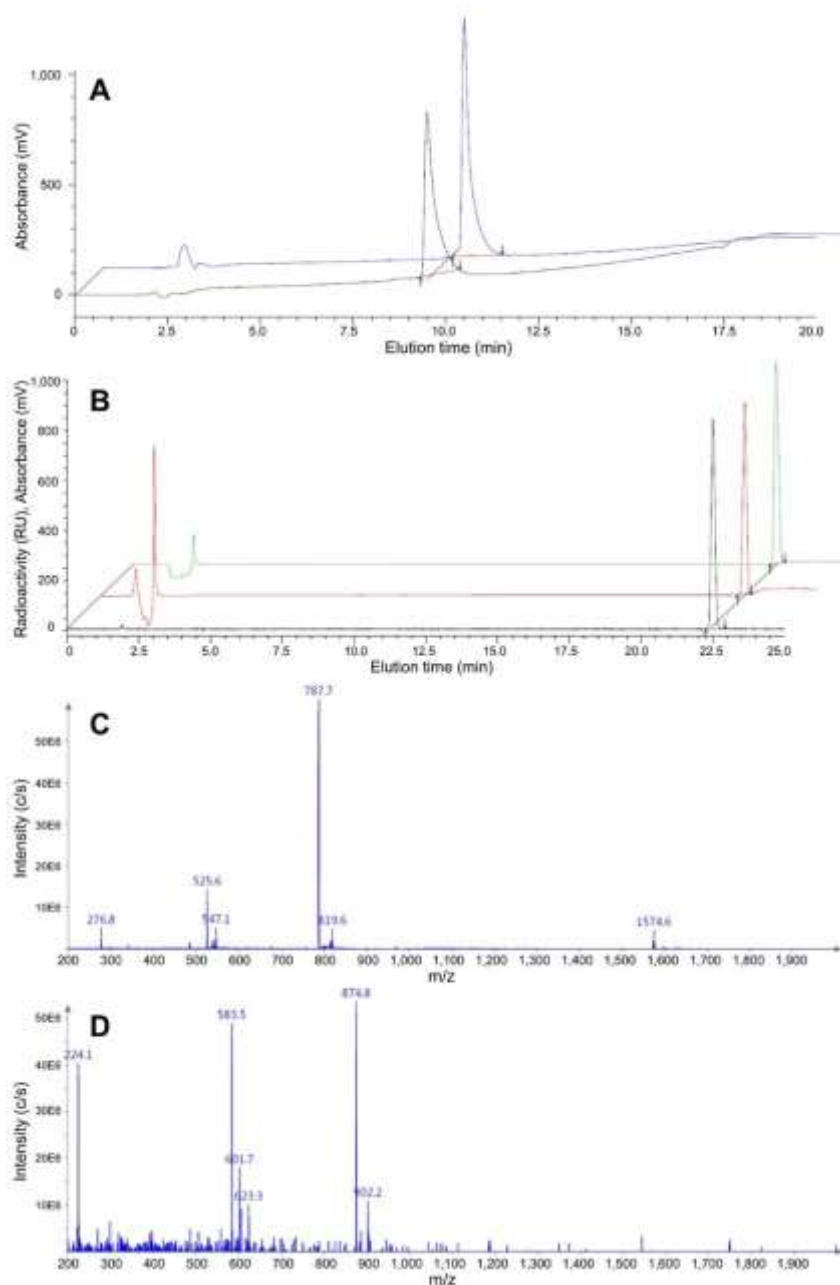

**SUPPLEMENTAL FIGURE 6.** (A) Confirmation of peptide identity and integrity for NeoBOMB1 (black) and <sup>nat</sup>Lu-NeoBOMB1 (blue), as analyzed by analytical RP-HPLC (MultoKrom 100-5 C18, 5 μm, 125 × 4.6 mm, CS *Chromatographie GmbH*, Langerwehe, Germany; 10→90% MeCN in H<sub>2</sub>O + 0.1% TFA in 15 min). (B) Confirmation of peptide identity and integrity for <sup>177</sup>Lu-NeoBOMB1 (black), <sup>nat</sup>Lu-NeoBOMB1 (red) and NeoBOMB1 (green), as analyzed by analytical (radio-)RP-HPLC (MultoKrom 100-5 C18, 5 μm, 125 × 4.6 mm, CS *Chromatographie GmbH*, Langerwehe, Germany; 20→35% MeCN in H<sub>2</sub>O + 0.1% TFA in 20 min). Mass spectra of (C) NeoBOMB1 and (D) <sup>nat</sup>Lu-NeoBOMB1.

**AMTG (DOTA-Pip-D-Phe-Gln- $\alpha$ -Me-Trp-Ala-Val-Gly-His-Sta-Leu-NH<sub>2</sub>)**

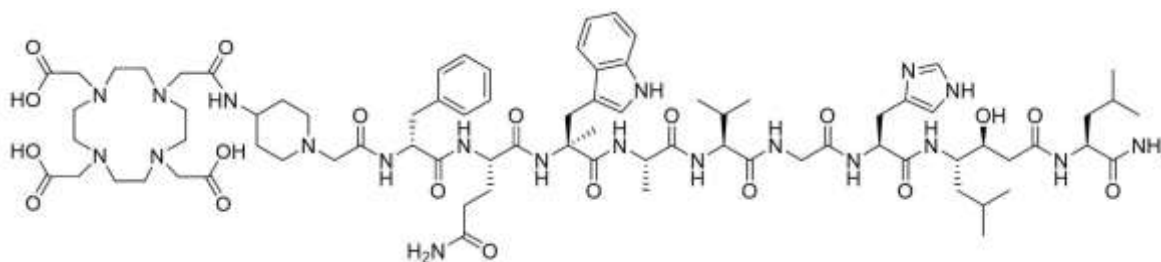

**SUPPLEMENTAL FIGURE 7.** Structural formula of AMG.

AMTG. RP-HPLC (10→90% MeCN in 15 min):  $t_R = 7.5$  min,  $K' = 2.75$ .

RP-HPLC (20→35% MeCN in 15 min):  $t_R = 15.2$  min,  $K' = 10.69$ .

Calculated monoisotopic mass (C<sub>79</sub>H<sub>120</sub>N<sub>20</sub>O<sub>19</sub>): 1652.9, found:  $m/z = 551.6$  [M+3H]<sup>3+</sup>, 826.6 [M+2H]<sup>2+</sup>, 1652.7 [M+H]<sup>+</sup>.

<sup>nat</sup>Lu-AMTG. RP-HPLC (10→90% MeCN in 15 min):  $t_R = 7.5$  min,  $K' = 2.75$ .

RP-HPLC (20→35% MeCN in 15 min):  $t_R = 15.0$  min,  $K' = 10.54$ .

Calculated monoisotopic mass (C<sub>79</sub>H<sub>117</sub>LuN<sub>20</sub>O<sub>19</sub>): 1824.8, found:  $m/z = 609.6$  [M+3H]<sup>3+</sup>, 914.0 [M+2H]<sup>2+</sup>.

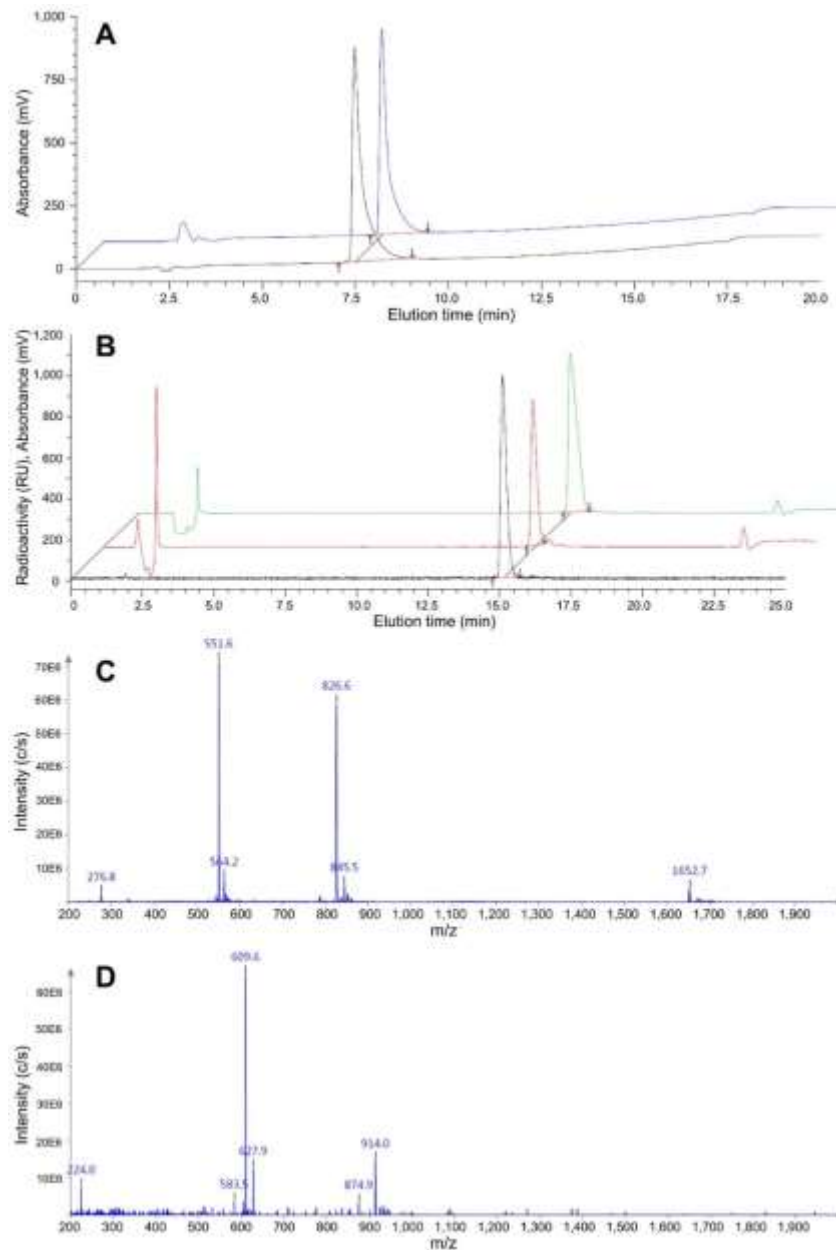

**SUPPLEMENTAL FIGURE 8.** (A) Confirmation of peptide identity and integrity for AMTG (black) and  $^{nat}\text{Lu}$ -AMTG (blue), as analyzed by analytical RP-HPLC (MultoKrom 100-5 C18, 5  $\mu\text{m}$ , 125  $\times$  4.6 mm, *CS Chromatographie GmbH*, Langerwehe, Germany; 10 $\rightarrow$ 90% MeCN in  $\text{H}_2\text{O}$  + 0.1% TFA in 15 min). (B) Confirmation of peptide identity and integrity for  $^{177}\text{Lu}$ -AMTG (black),  $^{nat}\text{Lu}$ -AMTG (red) and AMTG (green), as analyzed by analytical (radio-)RP-HPLC (MultoKrom 100-5 C18, 5  $\mu\text{m}$ , 125  $\times$  4.6 mm, *CS Chromatographie GmbH*, Langerwehe, Germany; 20 $\rightarrow$ 35% MeCN in  $\text{H}_2\text{O}$  + 0.1% TFA in 20 min). Mass spectra of (C) AMTG and (D)  $^{nat}\text{Lu}$ -AMTG.

**AMTG2 (DOTAGA-Pip-D-Phe-Gln- $\alpha$ -Me-Trp-Ala-Val-Gly-His-Sta-Leu-NH<sub>2</sub>)**

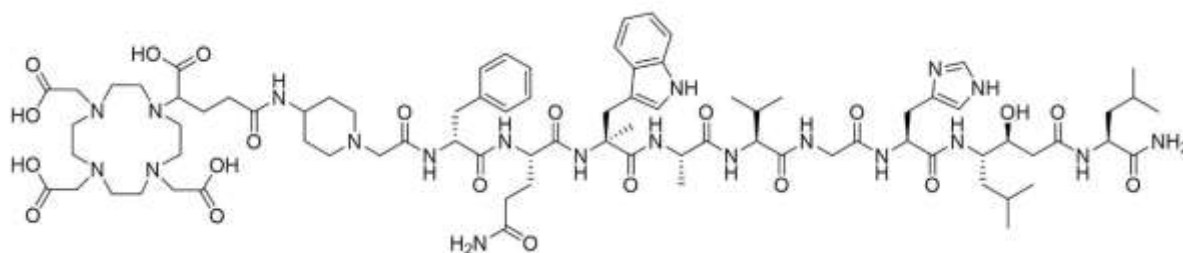

**SUPPLEMENTAL FIGURE 9.** Structural formula of AMG2.

AMTG2. RP-HPLC (10→90% MeCN in 15 min):  $t_R = 7.5$  min,  $K' = 2.75$ .

RP-HPLC (20→35% MeCN in 15 min):  $t_R = 15.2$  min,  $K' = 10.69$ .

Calculated monoisotopic mass (C<sub>82</sub>H<sub>124</sub>N<sub>20</sub>O<sub>21</sub>): 1724.9, found:  $m/z = 575.6$  [M+3H]<sup>3+</sup>, 862.6 [M+2H]<sup>2+</sup>, 1724.7 [M+H]<sup>+</sup>.

<sup>nat</sup>Lu-AMTG2. RP-HPLC (10→90% MeCN in 15 min):  $t_R = 7.7$  min,  $K' = 2.85$ .

RP-HPLC (20→35% MeCN in 15 min):  $t_R = 16.2$  min,  $K' = 11.46$ .

Calculated monoisotopic mass (C<sub>82</sub>H<sub>121</sub>LuN<sub>20</sub>O<sub>21</sub>): 1896.8, found:  $m/z = 633.8$  [M+3H]<sup>3+</sup>, 950.0 [M+2H]<sup>2+</sup>.

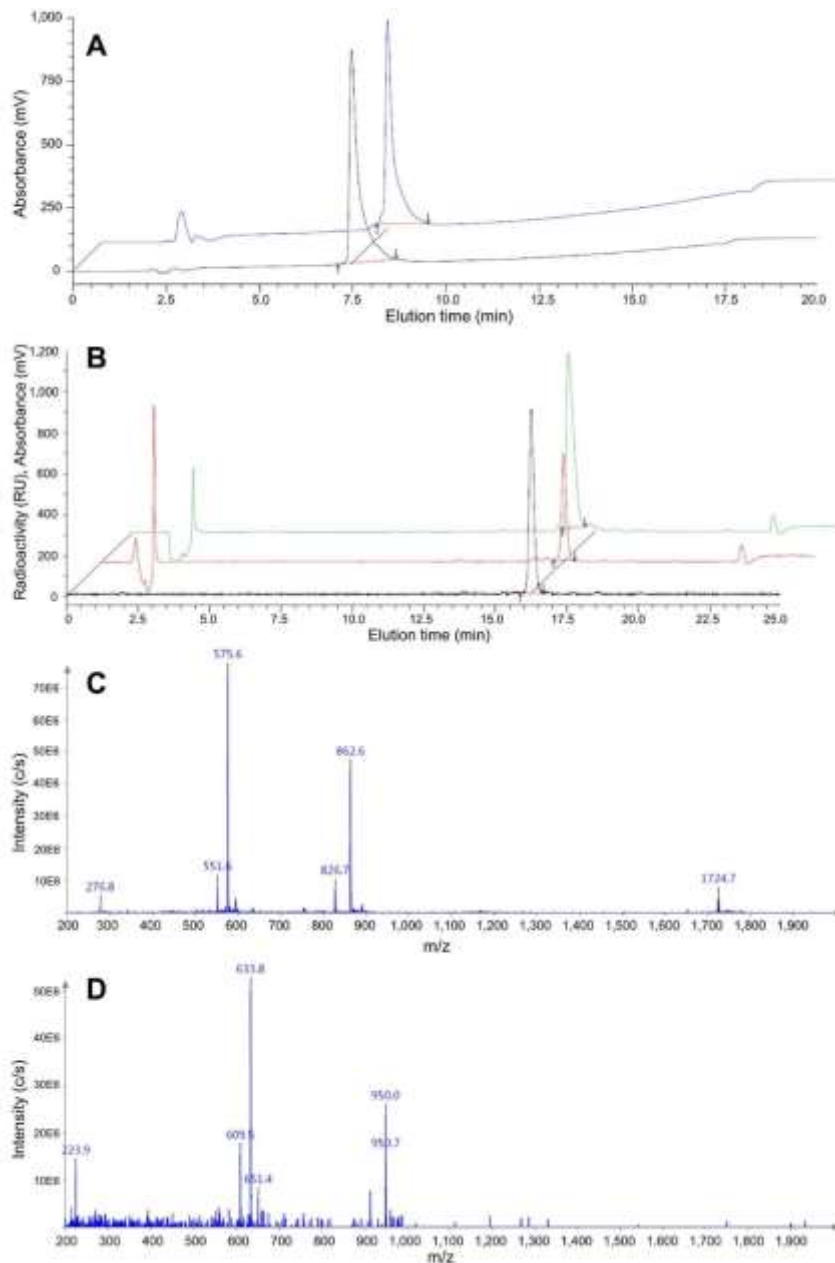

**SUPPLEMENTAL FIGURE 10.** (A) Confirmation of peptide identity and integrity for AMTG2 (black) and  $^{nat}\text{Lu}$ -AMTG2 (blue), as analyzed by analytical RP-HPLC (MultoKrom 100-5 C18, 5  $\mu\text{m}$ , 125  $\times$  4.6 mm, *CS Chromatographie GmbH*, Langerwehe, Germany; 10 $\rightarrow$ 90% MeCN in  $\text{H}_2\text{O}$  + 0.1% TFA in 15 min). (B) Confirmation of peptide identity and integrity for  $^{177}\text{Lu}$ -AMTG2 (black),  $^{nat}\text{Lu}$ -AMTG2 (red) and AMTG2 (green), as analyzed by analytical (radio-)RP-HPLC (MultoKrom 100-5 C18, 5  $\mu\text{m}$ , 125  $\times$  4.6 mm, *CS Chromatographie GmbH*, Langerwehe, Germany; 20 $\rightarrow$ 35% MeCN in  $\text{H}_2\text{O}$  + 0.1% TFA in 20 min). Mass spectra of (C) AMTG2 and (D)  $^{nat}\text{Lu}$ -AMTG2.

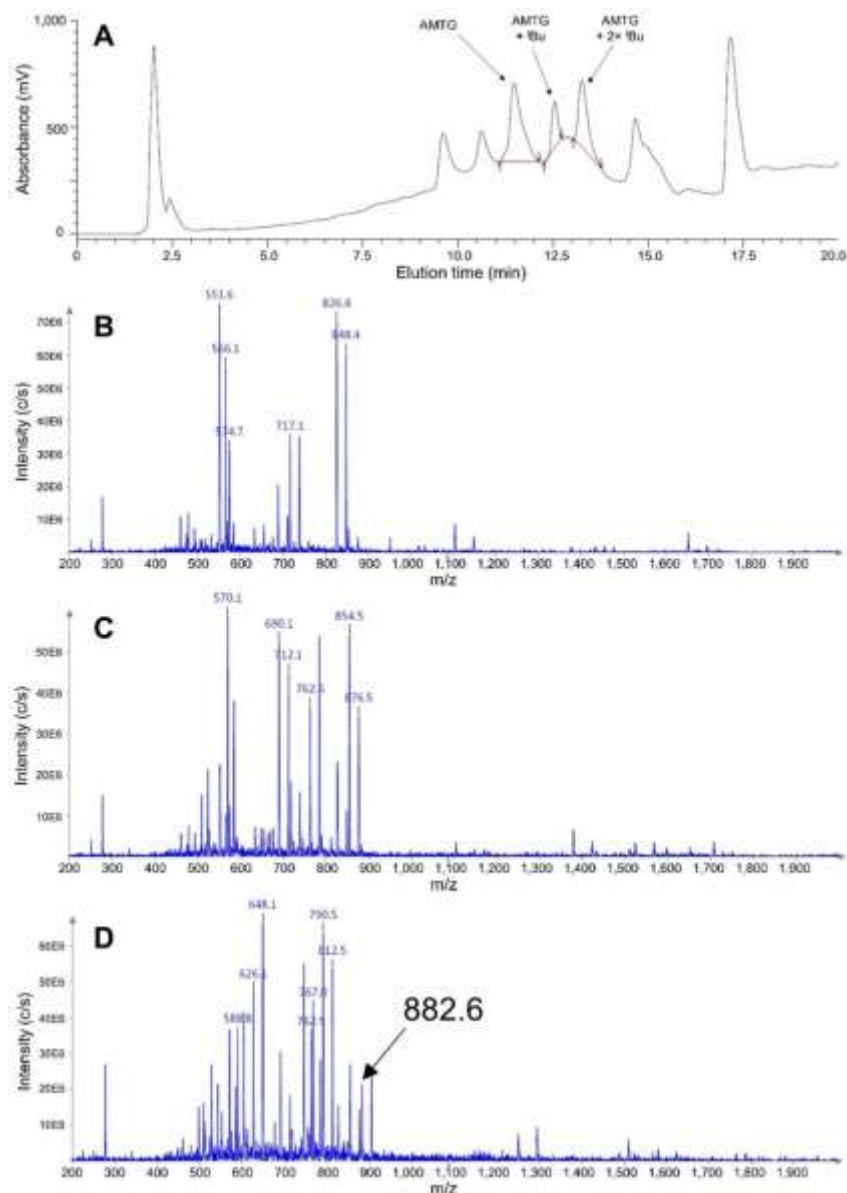

**SUPPLEMENTAL FIGURE 11.** Incomplete deprotection of <sup>t</sup>Bu groups of the DOTA moiety in AMTG (calculated monoisotopic mass: 1652.9), as analyzed by (A) analytical RP-HPLC (MultoKrom 100-5 C18, 5 μm, 125 × 4.6 mm, CS Chromatographie GmbH, Langerwehe, Germany; 20→35% MeCN in H<sub>2</sub>O + 0.1% TFA in 15 min) and mass spectrometry (B-D). (B) Mass spectrum of the fully deprotected compound (AMTG: *K'* = 6.2, *t<sub>R</sub>* = 11.5 min, mass found: *m/z* = 826.4 [M+2H]<sup>2+</sup>). (C) Mass spectrum of the compound carrying one <sup>t</sup>Bu group (AMTG + <sup>t</sup>Bu: *K'* = 6.8, *t<sub>R</sub>* = 12.5 min, mass found: *m/z* = 854.5 [M+2H]<sup>2+</sup>). (D) Mass spectrum of the compound carrying two <sup>t</sup>Bu groups (AMTG + 2× <sup>t</sup>Bu: *K'* = 7.3, *t<sub>R</sub>* = 13.2 min, mass found: *m/z* = 882.6 [M+2H]<sup>2+</sup>).

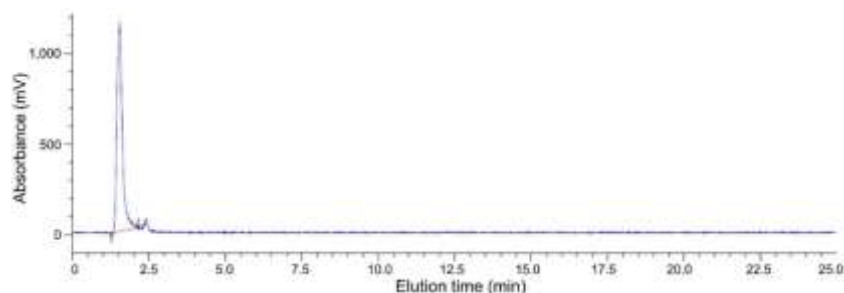

**SUPPLEMENTAL FIGURE 12.** Chromatogram of  $^{177}\text{Lu-LuCl}_3$ , (elution time  $t_R = 1.54$  min) as analyzed by analytical radio-RP-HPLC (MultoKrom 100-5 C18, 5  $\mu\text{m}$ , 125  $\times$  4.6 mm, CS Chromatographie GmbH, Langerwehe, Germany; 20 $\rightarrow$ 35% MeCN in  $\text{H}_2\text{O}$  + 0.1% TFA in 20 min).

### ***In Vitro* Experiments**

**Cell Culture.** GRPR<sup>+</sup> PC-3 cells (Merck KGaA, Darmstadt, Germany) were cultivated in Dulbecco's modified eagle's medium/Ham's F-12 (DMEM/F-12,  $v/v = 1/1$ , with stable glutamine, Biochrom GmbH, Berlin, Germany) supplemented with fetal bovine serum (10%, FBS Superior, Biochrom GmbH, Berlin, Germany) at 37 °C in a humidified 5%  $\text{CO}_2$  atmosphere. GRPR<sup>+</sup> T-47D cells (American Type Culture Collection, Manassas, VA, USA) were cultivated in Gibco™ RPMI 1640 Medium (Fisher Scientific GmbH, Schwerte, Germany) supplemented with fetal bovine serum (10%, FBS Superior, Biochrom GmbH, Berlin, Germany) at 37 °C in a humidified 5%  $\text{CO}_2$  atmosphere. A mixture of trypsin and ethylenediaminetetraacetic acid (0.05%, 0.02%) in PBS (Biochrom GmbH, Berlin, Germany) was used in order to harvest cells. Cells were counted with a Neubauer hemocytometer (Paul Marienfeld, Lauda-Königshofen, Germany).

**Determination of  $IC_{50}$ .** For determination of the GRPR affinity on both PC-3 and T-47D cells ( $IC_{50}$ ), cells were harvested  $24 \pm 2$  h before the experiment and seeded in 24-well plates ( $1.5 \times 10^5$  cells in 1 mL/well).

After removal of the culture medium, the cells were washed once with 500  $\mu\text{L}$  of HBSS (Hank's balanced salt solution, Biochrom GmbH, Berlin, Germany, with addition of 1% bovine

serum albumin (BSA, v/v)) and left in 200  $\mu$ L HBSS (1% BSA, v/v) for 9 min at room temperature for equilibration. Next, 25  $\mu$ L per well of solutions, containing either HBSS (1% BSA, v/v) as control or the respective compound in increasing concentration ( $10^{-10}$ – $10^{-4}$  M in HBSS (1% BSA, v/v)), were added with subsequent addition of 25  $\mu$ L of 3- $^{125}$ I-D-Tyr<sup>6</sup>-MJ9 (2.0 nM) in HBSS (1% BSA, v/v).

All experiments were performed in triplicate for each concentration. After 2 h incubation at rt, the experiment was terminated by removal of the medium and consecutive rinsing with 300  $\mu$ L of HBSS (1% BSA, v/v). The media of both steps were combined in one fraction and represent the amount of free 3- $^{125}$ I-D-Tyr<sup>6</sup>-MJ9. Afterwards, the cells were lysed with 300  $\mu$ L of 1 M NaOH for at least 15 min and united with the 300  $\mu$ L NaOH of the following washing step. Quantification of bound and free 3- $^{125}$ I-D-Tyr<sup>6</sup>-MJ9 was accomplished in a  $\gamma$ -counter.  $IC_{50}$  determination for each conjugate was repeated twice.

*Brief Competition Study to validate Assay Conditions.* In order to exclude an impact of free  $^{nat}\text{LuCl}_3$  (from labeling procedure, see *Cold Complexation* above) in the above-described  $IC_{50}$  assay, the study was repeated for  $^{nat}\text{Lu-AMTG}$  applying the same conditions. However, in addition to the used dilution series ( $10^{-10}$ – $10^{-4}$  M in HBSS (1% BSA, v/v)) of  $^{nat}\text{Lu-AMTG}$  (1.5-fold excess of free  $^{nat}\text{Lu}^{3+}$  present), two further dilution series were prepared. On the one hand, a 1,500-fold and on the other hand, a  $1.5 \times 10^6$ -fold excess of free  $^{nat}\text{Lu}^{3+}$  was added to each dilution of  $^{nat}\text{Lu-AMTG}$ .

The study confirmed that no noticeable effect of free  $^{nat}\text{Lu}^{3+}$  on the cellular uptake or displacement of 3- $^{125}$ I-D-Tyr<sup>6</sup>-MJ9 and thus  $IC_{50}$  values in the above-described assay could be determined (Supplemental Fig. 13).



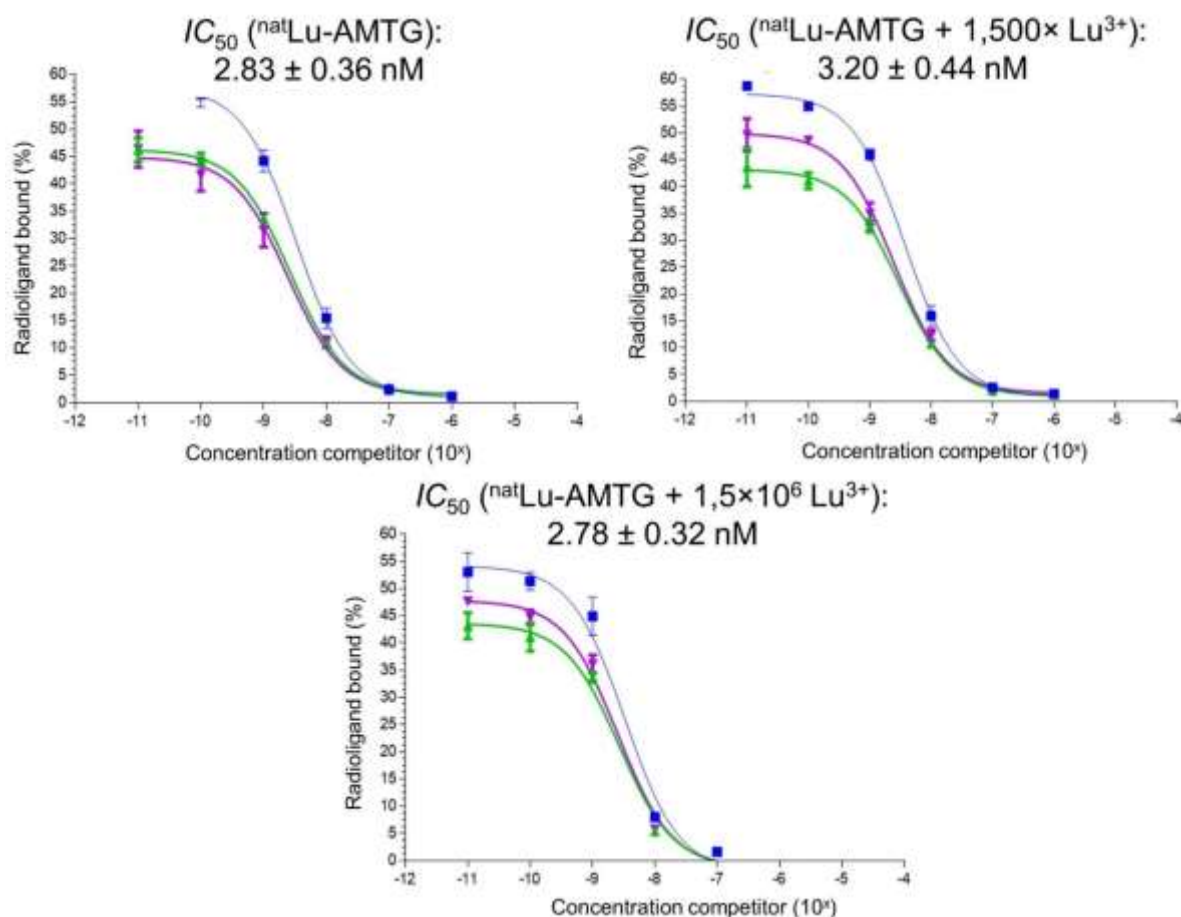

**SUPPLEMENTAL FIGURE 13.** Sigmoidal binding curves and calculated mean  $IC_{50}$ 's as obtained by competitive binding studies of  $^{nat}\text{Lu-AMTG}$ ,  $^{nat}\text{Lu-AMTG}$  with a 1,500-fold excess of free  $\text{Lu}^{3+}$  and  $^{nat}\text{Lu-AMTG}$  with a  $1.5 \times 10^6$ -fold excess of free  $\text{Lu}^{3+}$ . Binding studies have been carried out in triplicate, using  $1.5 \times 10^5$  PC-3 cells/ml/well, rt, 2 h; using  $3\text{-}^{125}\text{I-D-Tyr}^6\text{-MJ9}$  (0.2 nM/well) as radiolabeled reference ( $n = 3$ ).

*Receptor-mediated Internalization.* For internalization studies, PC-3 cells were harvested  $24 \pm 2$  h before the experiment and seeded in poly-L-lysine coated 24-well plates ( $1.5 \times 10^5$  cells/well, 1 mL, Greiner Bio-One, Kremsmünster, Austria). Subsequent to the removal of the culture medium, the cells were washed once with 500  $\mu\text{L}$  DMEM/F-12 (5% BSA, v/v) and left to equilibrate at 37 °C for at least 15 min in 200  $\mu\text{L}$  DMEM/F-12 (5% BSA, v/v). Each well was treated with either 25  $\mu\text{L}$  of DMEM/F-12 (5% BSA, v/v) or 25  $\mu\text{L}$   $^{nat}\text{Lu-RM2}$  ( $10^{-3}$  M) for blockade. Next, 25  $\mu\text{L}$  of the  $^{177}\text{Lu}$ -labeled GRPR analogue (10 nM) was added and the cells were incubated at 37 °C for 60 min.

The experiment was terminated by placing the 24-well plate on ice for 1 min and consecutive removal of the medium. Each well was rinsed with 300  $\mu$ L ice-cold PBS and the fractions from these first two steps were combined, representing the amount of free  $3\text{-}^{125}\text{I}\text{-D-Tyr}^6\text{-MJ9}$ . Removal of surface bound activity was accomplished by incubation of the cells with 300  $\mu$ L of ice-cold Acid Wash solution (0.02 M NaOAc, pH = 5.0) for 10 min at room temperature and rinsed again with 300  $\mu$ L of ice-cold PBS. The internalized activity was determined by incubation of the cells in 300  $\mu$ L NaOH (1 M) and the combination with the fraction of a subsequent washing step with 300  $\mu$ L NaOH (1 M).

Each experiment (control and blockade) was performed sixfold. Free, surface bound and internalized activity was quantified in a  $\gamma$ -counter. Data was corrected for non-specific internalization.

### ***In Vivo* Experiments**

*Establishment of Tumor Xenografts.* PC-3 cells ( $5.0 \times 10^6$  cells per 200  $\mu$ L) were suspended in a mixture ( $v/v = 1/1$ ) of Dulbecco's modified eagle's medium/Ham's F-12 (DMEM/F-12) with Glutamax-I (1/1) and Cultrex<sup>®</sup> Basement Membrane Matrix Type 3 (Trevigen Inc., Gaithersburg, MD, USA) and inoculated subcutaneously onto the right shoulder of 6–10 weeks old female CB17-SCID mice (*Charles River Laboratories International Inc.*, Sulzfeld, Germany). Mice were used for experiments when tumor volume was 125-500  $\text{mm}^3$  (2–3 weeks after inoculation).

## Supplemental Data

**SUPPLEMENTAL TABLE 1.** Preclinical data of  $^{nat}\text{Lu}$ -RM2,  $^{nat}\text{Lu}$ -NeoBOMB1,  $^{nat}\text{Lu}$ -AMTG and  $^{nat}\text{Lu}$ -AMTG2. Affinity data were determined on PC-3 and T-47D cells ( $1.5 \times 10^5$  cells/well) and  $3\text{-}^{125}\text{I}\text{-D-Tyr}^6\text{-MJ9}$  ( $c = 0.2$  nM) as radiolabeled reference (2 h, rt, HBSS + 1% BSA, *v/v*). Receptor-mediated internalization (0.25 pmol/well) was determined on PC-3 cells as percent (%) of the applied activity after incubation for 1 h (37 °C, DMEM/F-12 + 5% BSA (*v/v*),  $1.5 \times 10^5$  cells/well). Data are corrected for non-specific binding ( $10^{-3}$  M  $^{nat}\text{Lu}$ -RM2). Metabolic stability *in vitro* was determined in human plasma by incubation at 37 °C for  $72 \pm 2$  h ( $n = 4$ ). Metabolic stability *in vivo* was determined on CB17-SCID mice at 30 min p.i. ( $n = 3$ ). Data are expressed as mean  $\pm$  SD. Metabolic stability of the  $^{177}\text{Lu}$ -RM2 derivatives as determined *in vitro* and *in vivo*. \*  $^{nat}\text{Lu}$ -labeled, \*\*  $^{177}\text{Lu}$ -labeled.

| GRPR-targeted compound | $IC_{50}$ (nM)          |                          | GRPR-mediated internalization (%) | $\log D_{7.4}$   | Fraction intact tracer (%)                                  |                                                           |                                                           |
|------------------------|-------------------------|--------------------------|-----------------------------------|------------------|-------------------------------------------------------------|-----------------------------------------------------------|-----------------------------------------------------------|
|                        | PC-3 cells ( $n = 3$ )* | T-47D-cells ( $n = 3$ )* | ( $n = 5$ )**                     | ( $n = 6$ )**    | human plasma, <i>in vitro</i> at $72 \pm 2$ h ( $n = 4$ )** | murine blood, <i>in vivo</i> at 30 min p.i. ( $n = 3$ )** | murine urine, <i>in vivo</i> at 30 min p.i. ( $n = 3$ )** |
| RM2                    | $3.5 \pm 0.2$           | $1.2 \pm 0.2$            | $2.92 \pm 0.20$                   | $-2.51 \pm 0.02$ | $38.7 \pm 9.3$                                              | $11.4 \pm 3.7$                                            | $0.5 \pm 0.1$                                             |
| NeoBOMB1               | $4.2 \pm 0.1$           | $1.1 \pm 0.2$            | $13.91 \pm 0.64$                  | $-0.57 \pm 0.03$ | $61.9 \pm 2.1$                                              | $75.9 \pm 0.6$                                            | $3.9 \pm 1.3$                                             |
| AMTG                   | $3.0 \pm 0.1$           | $1.0 \pm 0.1$            | $3.03 \pm 0.18$                   | $-2.28 \pm 0.06$ | $77.7 \pm 8.7$                                              | $92.9 \pm 0.7$                                            | $68.2 \pm 3.1$                                            |
| AMTG2                  | $4.7 \pm 0.2$           | $4.6 \pm 0.2$            | $5.88 \pm 0.33$                   | $-2.51 \pm 0.11$ | $66.2 \pm 5.1$                                              | $77.6 \pm 3.1$                                            | $61.6 \pm 1.6$                                            |

**SUPPLEMENTAL TABLE 2.** Tumor/background ratios of  $^{177}\text{Lu}$ -RM2 and its analogues as well as  $^{177}\text{Lu}$ -NeoBOMB1 for the selected organs of PC-3 tumor-bearing CB17-SCID mice at 24 h p.i. (n = 4).

| Organ     | $^{177}\text{Lu}$ -RM2 | $^{177}\text{Lu}$ -AMTG | $^{177}\text{Lu}$ -AMTG2 | $^{177}\text{Lu}$ -NeoBOMB1 |
|-----------|------------------------|-------------------------|--------------------------|-----------------------------|
| Blood     | 688.7 ± 79.4           | 2702.0 ± 321.0          | 723.1 ± 109.2            | 175.5 ± 100.2               |
| Heart     | 152.8 ± 7.4            | 575.3 ± 98.3            | 646.9 ± 597.4            | 87.5 ± 37.0                 |
| Lung      | 91.4 ± 16.4            | 357.2 ± 107.8           | 181.2 ± 29.6             | 16.7 ± 2.0                  |
| Liver     | 18.8 ± 1.3             | 85.3 ± 19.5             | 27.4 ± 6.4               | 5.6 ± 2.7                   |
| Spleen    | 42.8 ± 5.2             | 114.3 ± 24.9            | 59.4 ± 14.2              | 5.3 ± 3.1                   |
| Pancreas  | 19.9 ± 2.5             | 26.1 ± 12.0             | 8.4 ± 0.8                | 0.9 ± 0.2                   |
| Stomach   | 50.8 ± 19.3            | 128.3 ± 47.7            | 64.9 ± 5.0               | 5.6 ± 0.2                   |
| Intestine | 39.7 ± 7.0             | 80.0 ± 49.7             | 27.5 ± 5.7               | 8.5 ± 0.6                   |
| Kidney    | 4.7 ± 0.1              | 10.5 ± 2.5              | 4.3 ± 0.4                | 4.7 ± 2.3                   |
| Adrenal   | 10.9 ± 1.7             | 34.3 ± 21.8             | 22.7 ± 2.9               | 2.1 ± 0.1                   |
| Muscle    | 1680.2 ± 978.9         | 2247.8 ± 687.3          | 4133.8 ± 2593.0          | 1017.0 ± 598.5              |
| Bone      | 7.9 ± 3.6              | 234.3 ± 69.4            | 37.9 ± 11.3              | 42.2 ± 17.4                 |

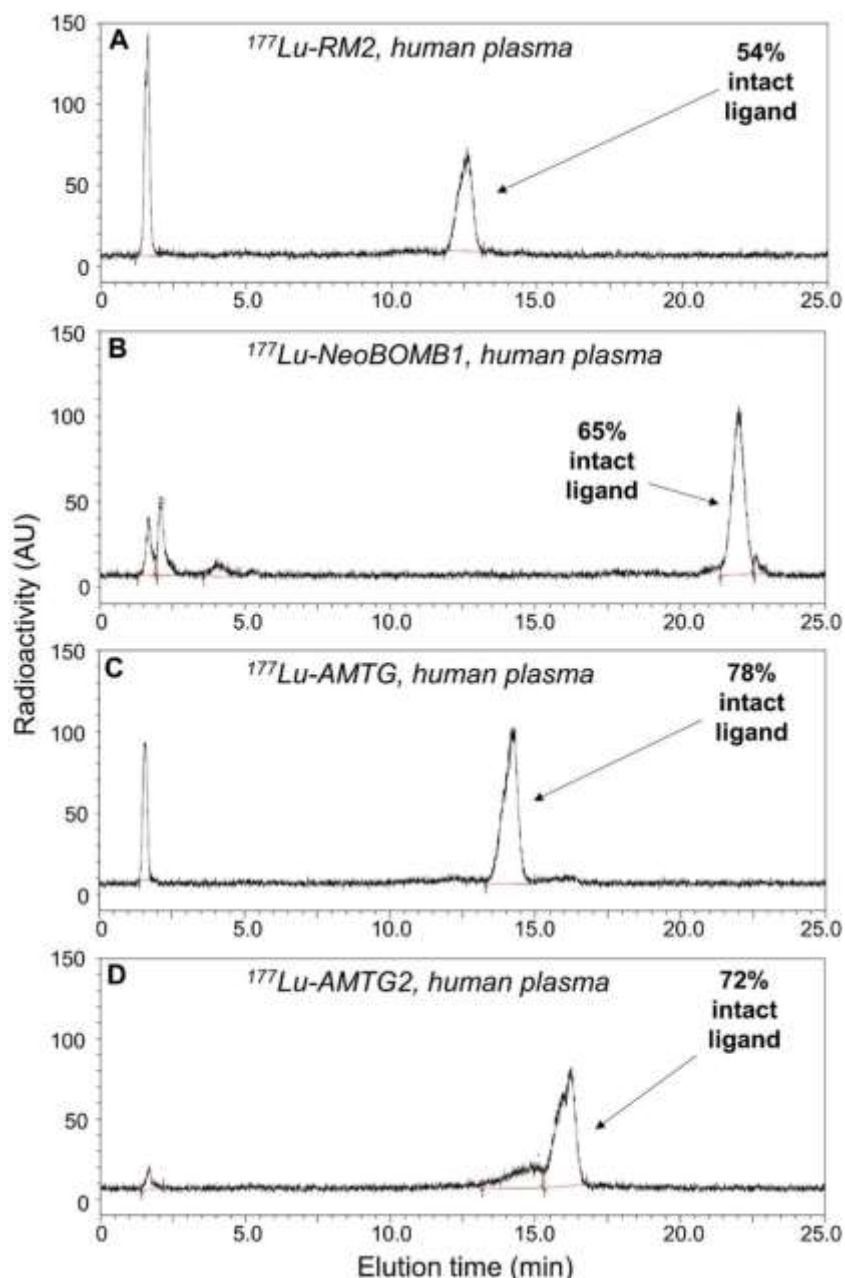

**SUPPLEMENTAL FIGURE 14.** *In vitro* stability of  $^{177}\text{Lu}$ -labeled GRPR ligands incubated in human plasma at  $37\text{ }^{\circ}\text{C}$  for  $72 \pm 2\text{ h}$ , as analyzed by analytical radio-RP-HPLC (MultoKrom 100-5 C18,  $5\text{ }\mu\text{m}$ ,  $125 \times 4.6\text{ mm}$ , CS Chromatographie GmbH, Langerwehe, Germany; 20 $\rightarrow$ 35% MeCN in  $\text{H}_2\text{O}$  + 0.1% TFA in 20 min). (A)  $^{177}\text{Lu}$ -RM2, (B)  $^{177}\text{Lu}$ -NeoBOMB1, (C)  $^{177}\text{Lu}$ -AMTG and (D)  $^{177}\text{Lu}$ -AMTG2. Fractions representing intact compounds are indicated by black arrows ( $^{177}\text{Lu}$ -RM2:  $K' = 8.7$ ,  $t_R = 12.6\text{ min}$ ;  $^{177}\text{Lu}$ -NeoBOMB1:  $K' = 15.9$ ,  $t_R = 22.0\text{ min}$ ;  $^{177}\text{Lu}$ -AMTG:  $K' = 9.9$ ,  $t_R = 14.2\text{ min}$ ;  $^{177}\text{Lu}$ -AMTG2:  $K' = 11.5$ ,  $t_R = 16.3\text{ min}$ ).

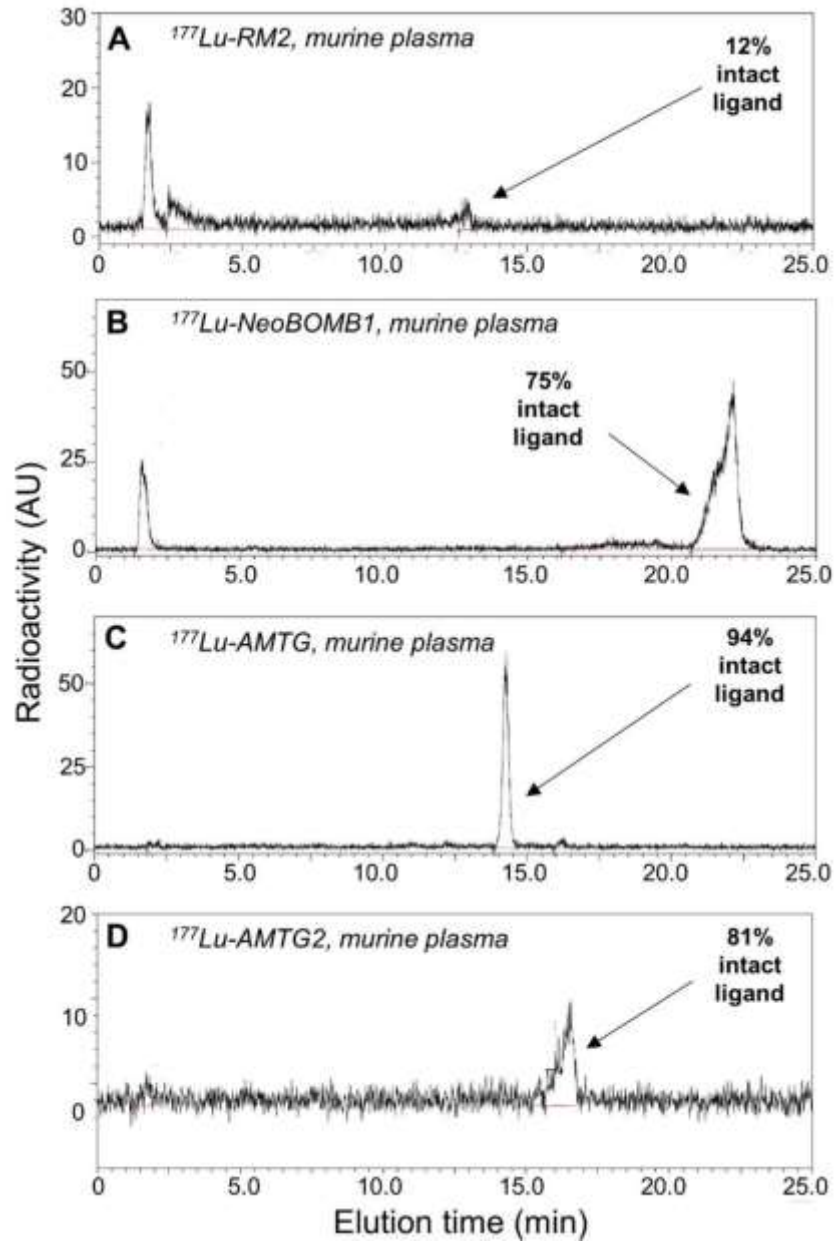

**SUPPLEMENTAL FIGURE 15.** *In vivo* stability of  $^{177}\text{Lu}$ -labeled GRPR ligands in murine plasma (A-D) at 30 min p.i., as analyzed by analytical radio-RP-HPLC (MultoKrom 100-5 C18, 5  $\mu\text{m}$ , 125  $\times$  4.6 mm, CS Chromatographie GmbH, Langerwehe, Germany; 20 $\rightarrow$ 35% MeCN in  $\text{H}_2\text{O}$  + 0.1% TFA in 20 min). (A)  $^{177}\text{Lu}$ -RM2, (B)  $^{177}\text{Lu}$ -NeoBOMB1, (C)  $^{177}\text{Lu}$ -AMTG and (D)  $^{177}\text{Lu}$ -AMTG2. Fractions representing intact compounds indicated by black arrows ( $^{177}\text{Lu}$ -RM2:  $K'$  = 8.7,

$t_R = 12.8$  min;  $^{177}\text{Lu}$ -NeoBOMB1:  $K' = 15.9$ ,  $t_R = 22.9$  min;  $^{177}\text{Lu}$ -AMTG:  $K' = 9.9$ ,  $t_R = 14.5$  min,  $^{177}\text{Lu}$ -AMTG2:  $K' = 11.5$ ,  $t_R = 16.6$  min).

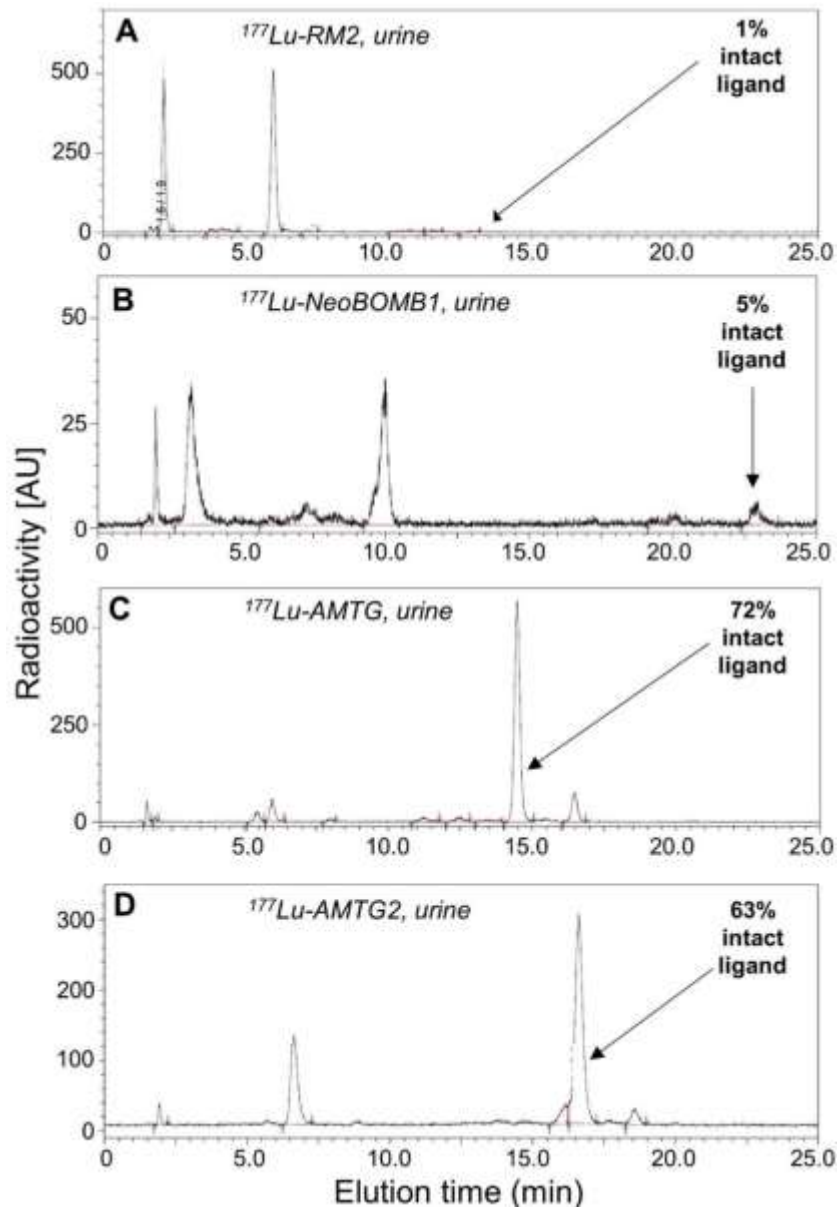

**SUPPLEMENTAL FIGURE 16.** *In vivo* stability of  $^{177}\text{Lu}$ -labeled GRPR ligands in murine urine (A-D) at 30 min p.i., as analyzed by analytical radio-RP-HPLC (MultoKrom 100-5 C18, 5  $\mu\text{m}$ , 125  $\times$  4.6 mm, CS Chromatographie GmbH, Langerwehe, Germany; 20 $\rightarrow$ 35% MeCN in  $\text{H}_2\text{O}$  + 0.1% TFA in 20 min). (A)  $^{177}\text{Lu}$ -RM2, (B)  $^{177}\text{Lu}$ -NeoBOMB1, (C)  $^{177}\text{Lu}$ -AMTG and (D)  $^{177}\text{Lu}$ -AMTG2. Fractions representing intact compounds indicated by black arrows ( $^{177}\text{Lu}$ -RM2:  $K' = 8.7$ , THE JOURNAL OF NUCLEAR MEDICINE • Vol. 63 • No. 9 • September 2022 Foray et al.

$t_R = 12.8$  min;  $^{177}\text{Lu}$ -NeoBOMB1:  $K' = 15.9$ ,  $t_R = 22.9$  min;  $^{177}\text{Lu}$ -AMTG:  $K' = 9.9$ ,  $t_R = 14.5$  min,  
 $^{177}\text{Lu}$ -AMTG2:  $K' = 11.5$ ,  $t_R = 16.6$  min).



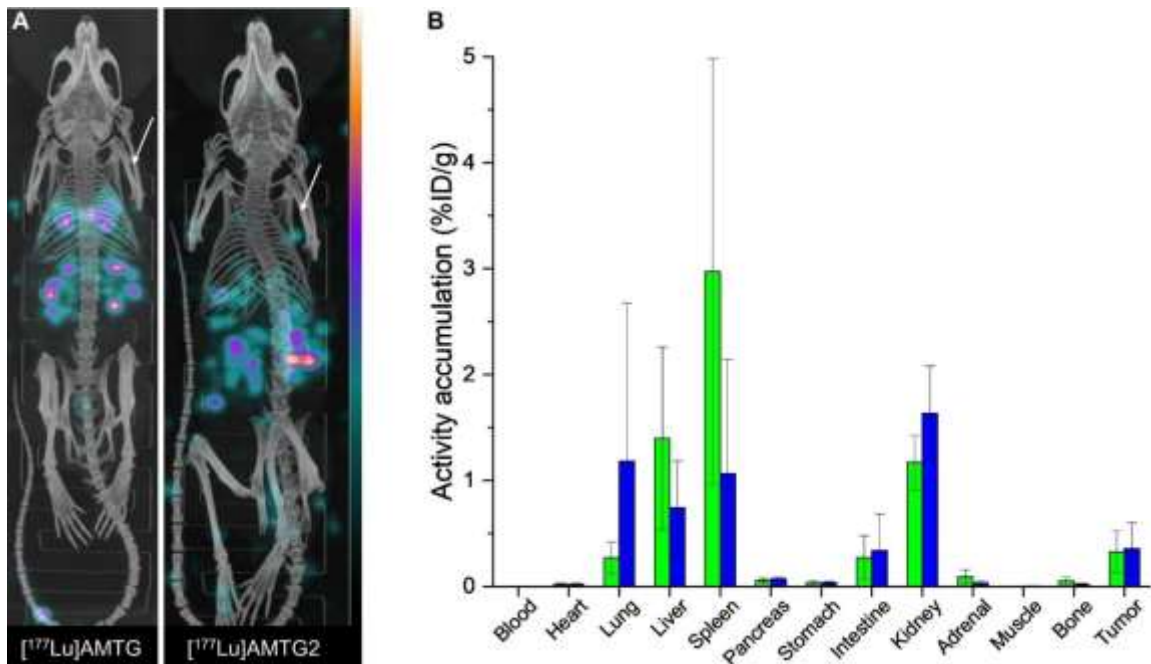

**SUPPLEMENTAL FIGURE 17.** (A) Maximum intensity projection of PC-3 tumor-bearing CB17-SCID mice injected with each 100 pmol of  $^{177}\text{Lu}$ -AMTG (left) and  $^{177}\text{Lu}$ -AMTG2 (right) and co-injected with an excess of  $^{nat}\text{Lu}$ -RM2 (3.62 mg/kg). Images were acquired at 24 h p.i. PC-3 tumors are depicted by white arrows; (B) Biodistribution of  $^{177}\text{Lu}$ -AMTG (green) and  $^{177}\text{Lu}$ -AMTG2 (blue) co-injected with an excess of  $^{nat}\text{Lu}$ -RM2 (3.62 mg/kg) in selected organs (in %ID/g) at 24 h p.i. in PC-3 tumor-bearing CB17-SCID mice (100 pmol each). Data is expressed as mean  $\pm$  SD (n = 3).

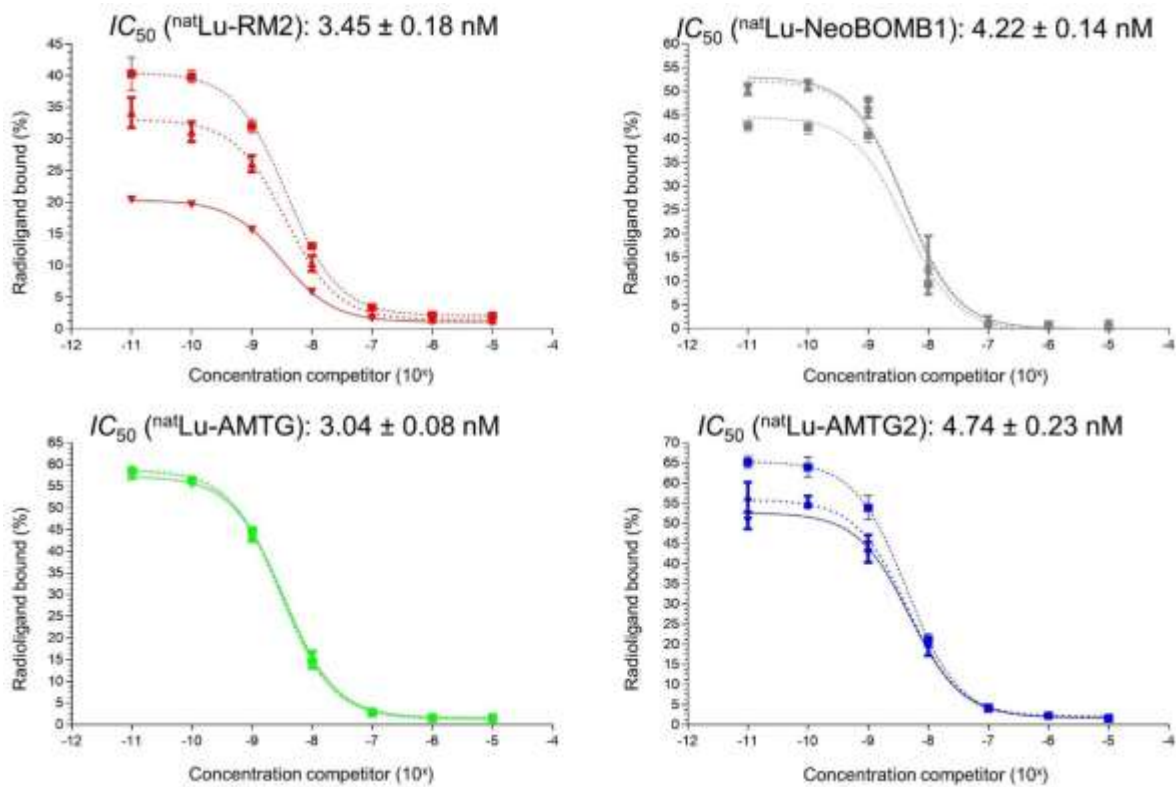

**SUPPLEMENTAL FIGURE 18.** Sigmoidal binding curves and calculated mean  $IC_{50}$ 's as obtained by competitive binding studies of  $^{nat}Lu$ -RM2,  $^{nat}Lu$ -NeoBOMB1,  $^{nat}Lu$ -AMTG and  $^{nat}Lu$ -AMTG2. Binding studies have been carried out in triplicate, using  $1.5 \times 10^5$  PC-3 cells/ml/well, rt, 2 h; using  $3\text{-}^{125}I$ -D-Tyr<sup>6</sup>-MJ9 (0.2 nM/well) as radiolabeled reference (n = 3).

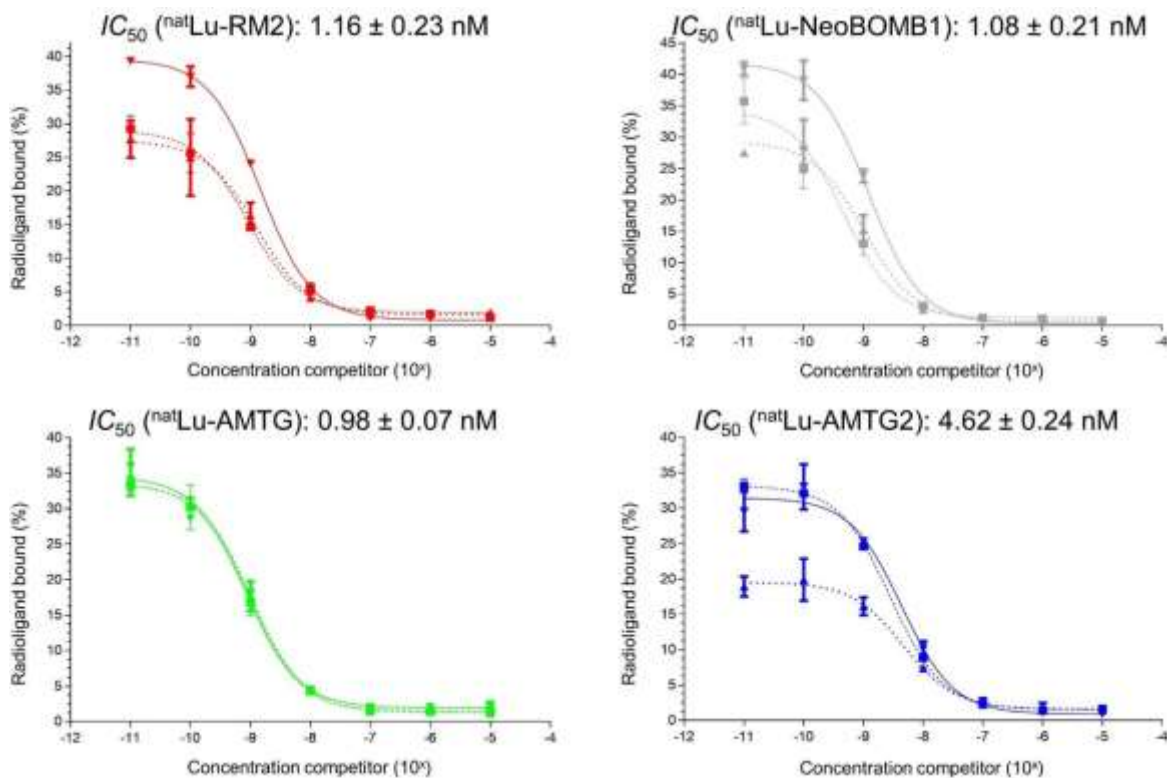

**SUPPLEMENTAL FIGURE 19.** Sigmoidal binding curves and calculated mean  $IC_{50}$ 's as obtained by competitive binding studies of  $^{nat}$ Lu-RM2,  $^{nat}$ Lu-NeoBOMB1,  $^{nat}$ Lu-AMTG and  $^{nat}$ Lu-AMTG2. Binding studies have been carried out in triplicate, using  $1.5 \times 10^5$  T-47D cells/ml/well, rt, 2 h; using 3- $^{125}$ I-D-Tyr<sup>6</sup>-MJ9 (0.2 nM/well) as radiolabeled reference ( $n = 3$ ).
